# Supplementary material
Source: PubMed Central journal article supplement (PMC1851839)
Supplement: plntphys_pp.106.095158_1.pdf [file plntphys_pp.106.095158_1.pdf]

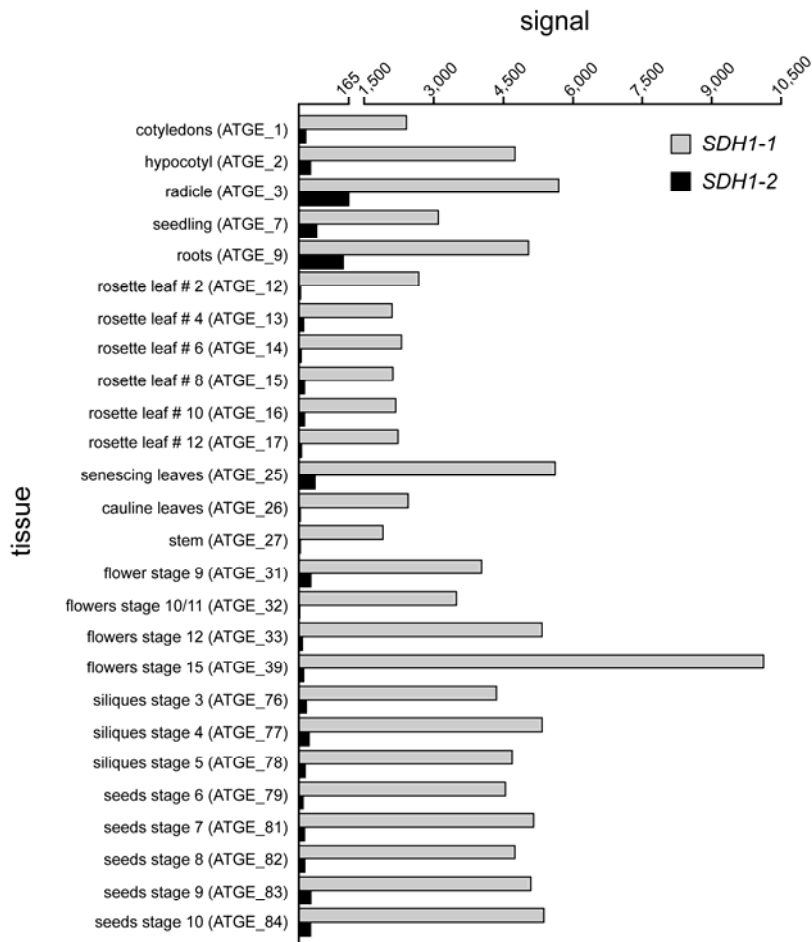

**Supplemental Figure S1.** *SDH1-1* and *SDH1-2* expression in different tissues and developmental stages. Data used to generate the digital Northern were obtained from the Genevestigator web site (<https://www.genevestigator.ethz.ch>). Experimental data were obtained by Schmid et al. (2005) and deposited at AtGenExpress (ArrayExpress accession number E-AFMX-9).
