# Supplementary material
Source: PubMed Central journal article supplement (PMC1851839)
Supplement: plntphys_pp.106.095158_2.pdf [file plntphys_pp.106.095158_2.pdf]

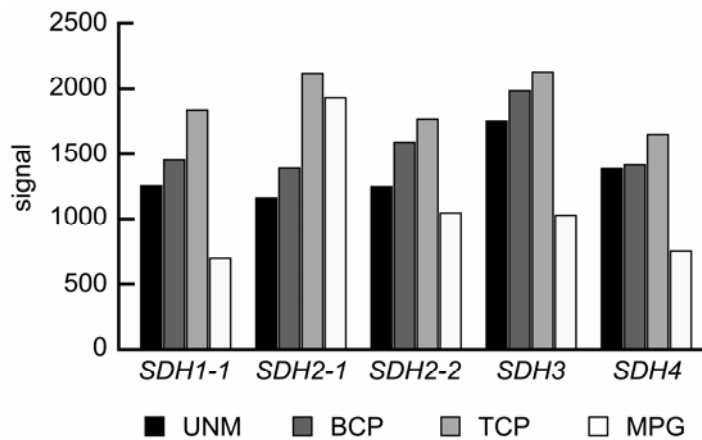

**Supplemental Figure S2.** Expression of Complex II Genes during Pollen Development. Data used to generate the digital Northern were obtained from NASC microarrays (Honys and Twell, 2004) at the Genevestigator web site (<https://www.genevestigator.ethz.ch>). Mean signal intensities were averaged from two technical replicates, except for MPG. UNM, uninucleate microspores; BCP, bicellular pollen grains; TCP, tricellular pollen grains; MPG, mature pollen grains.
