# Supplementary material
Source: PubMed Central journal article supplement (PMC1851839)
Supplement: plntphys_pp.106.095158_3.pdf [file plntphys_pp.106.095158_3.pdf]

**Supplemental Table S1.** Segregation analysis of *sdh1-1*.

The inheritance of *sdh1-1* was analyzed by counting kanamycin resistant and sensitive seedlings recovered from six selfed T<sub>2</sub> *SDH1-1/sdh1-1* plants. Kan<sup>r</sup>, kanamycin resistant; Kan<sup>s</sup>, kanamycin sensitive.

| T <sub>2</sub> | Seedlings   | Kan <sup>r</sup> | Kan <sup>s</sup> | Ratio        | %Kan <sup>r</sup> |
|----------------|-------------|------------------|------------------|--------------|-------------------|
| 1              | 121         | 34               | 87               | 0.4:1        | 28                |
| 2              | 87          | 28               | 59               | 0.5:1        | 32                |
| 3              | 88          | 28               | 60               | 0.5:1        | 32                |
| 4              | 690         | 223              | 467              | 0.5:1        | 32                |
| 5              | 130         | 44               | 86               | 0.5:1        | 34                |
| 6              | 127         | 30               | 97               | 0.3:1        | 24                |
| <b>Total</b>   | <b>1243</b> | <b>387</b>       | <b>856</b>       | <b>0.5:1</b> | <b>31</b>         |
