# Supplementary material
Source: PubMed Central journal article supplement (PMC1851839)
Supplement: plntphys_pp.106.095158_5.pdf [file plntphys_pp.106.095158_5.pdf]

**Supplemental Table S3. Frequency of Aborted Pollen in *SDH1-1/sdh1-1* Plants.**

Alexander staining was performed for 15 min with flowers from twelve T<sub>3</sub> Kan<sup>r</sup> *SDH1-1/sdh1-1* plants (1 to 12) and one wild type plant (wt). Normal, viable pollen grains (purple, with a green outer layer), and aborted pollen grains (completely green) were counted under a microscope.

| T <sub>3</sub> plants | Normal Pollen | Aborted Pollen | Total       | % Aborted Pollen |
|-----------------------|---------------|----------------|-------------|------------------|
| 1                     | 148           | 107            | 255         | 42.0             |
| 2                     | 128           | 117            | 245         | 47.8             |
| 3                     | 169           | 164            | 333         | 49.2             |
| 4                     | 147           | 138            | 285         | 48.4             |
| 5                     | 177           | 173            | 350         | 49.4             |
| 6                     | 73            | 52             | 125         | 41.6             |
| 7                     | 100           | 81             | 181         | 44.8             |
| 8                     | 131           | 101            | 232         | 43.5             |
| 9                     | 227           | 194            | 421         | 46.1             |
| 10                    | 107           | 89             | 196         | 45.4             |
| 11                    | 108           | 81             | 189         | 42.9             |
| 12                    | 170           | 151            | 321         | 47.0             |
| <b>Total</b>          | <b>1685</b>   | <b>1448</b>    | <b>3133</b> | <b>46.2</b>      |
| wt                    | 298           | 2              | 300         | 0.7              |
